# Supplementary material for: Three-Dimensional Culture Modelling Reveals Divergent Mycobacterium tuberculosis Virulence and Antimicrobial Treatment Response
Source: Hindawi journal article supplement (doi:10.1155/2024/6458900), 2024-05-03
Supplement: f1 [file 6458900.f1.pdf]

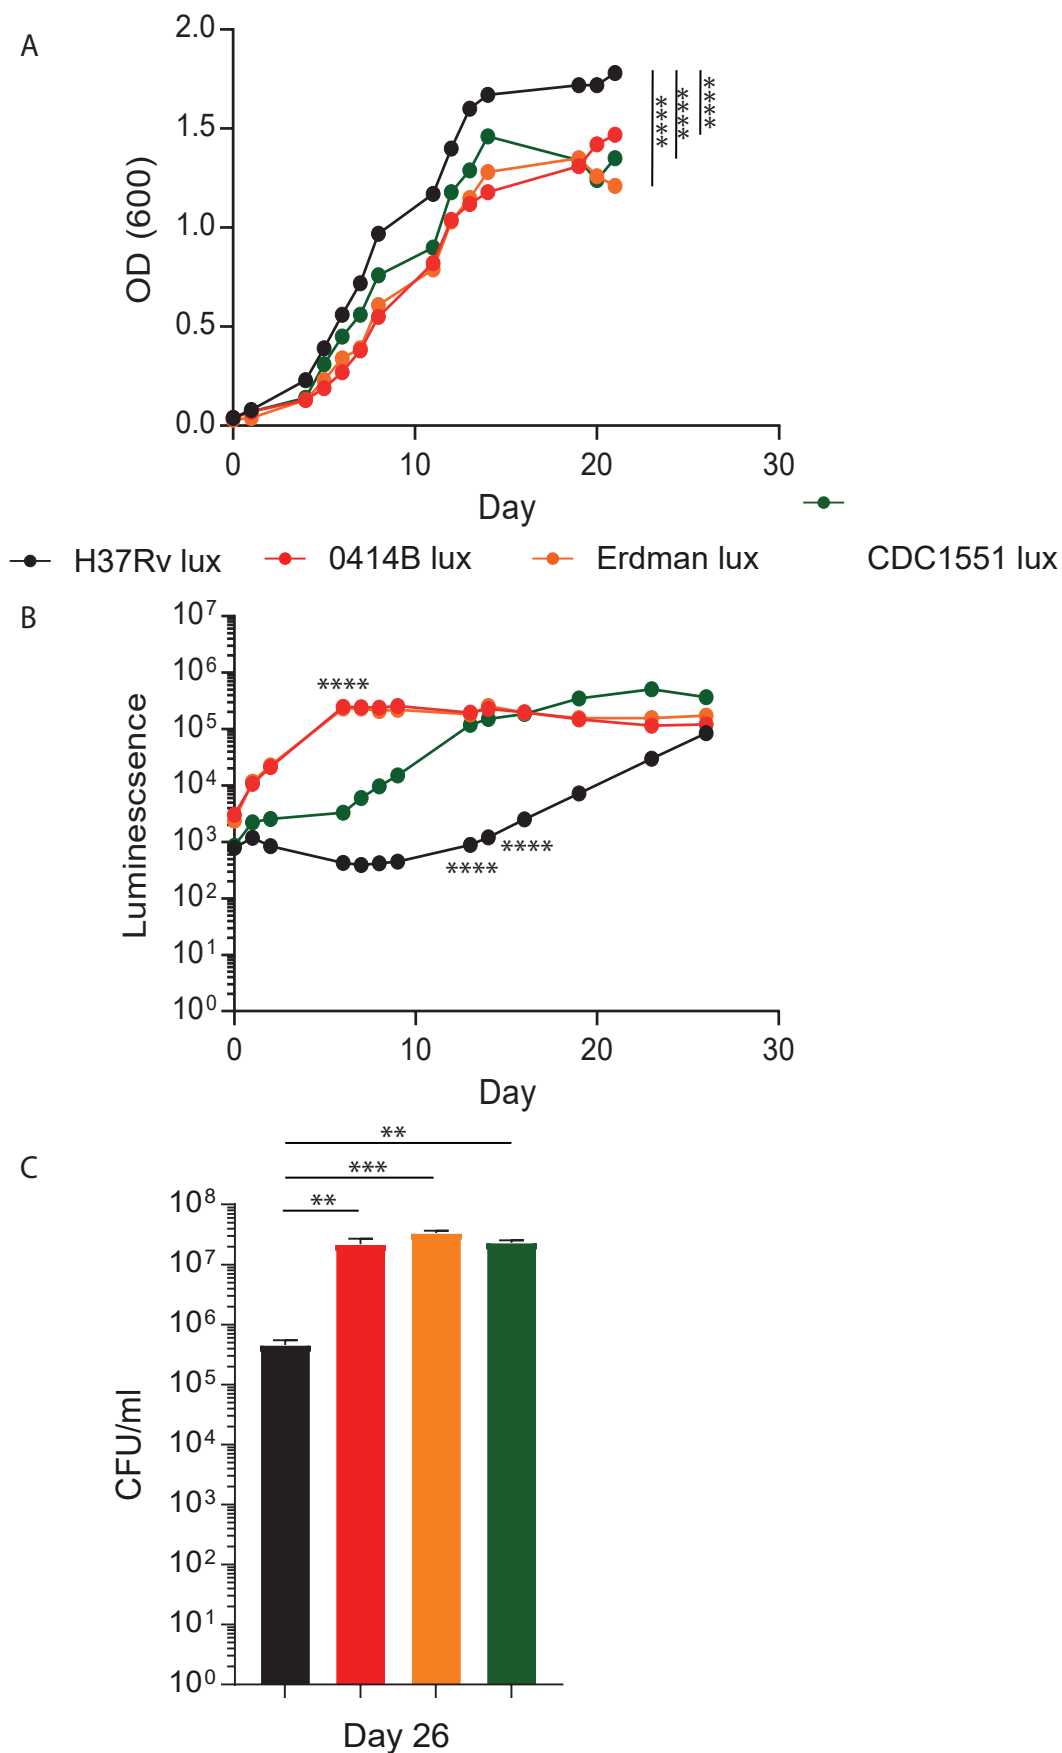

**Fig. S1: Clinical isolate 0414B lux and other reference strains grow more rapidly in the 3-D model.** (A) H37Rv lux grows faster than the clinical isolate 0414B lux and investigated reference strains (Erdman lux and CDC1551 lux) in Middlebrook 7H9 broth measured by optical density (OD) at 600nm. Experiments were performed in triplicate. (B) H37Rv lux is attenuated in comparison to the clinical isolate 0414B lux and the reference strains, Erdman lux and CDC1551 lux, in the 3-D system measured by luminescence. (C) Colony counts performed at day 26 confirm that H37Rv lux growth is reduced in comparison to the clinical isolate 0414B lux and the reference strains, Erdman lux and CDC1551 lux, in the 3-D system. Colour code as in (A) and (B). (B, C) Data are the mean  $\pm$  the standard error of the mean of an experiment performed in triplicate and are representative of two separate experiments. Statistical analyses were carried out using 2-way ANOVA with Tukey's multiple comparisons test (A, B) or Ordinary one-way ANOVA Tukey's multiple comparisons test (C); \*\*\*\*  $p < 0.0001$ , \*\*\*  $p < 0.001$ , \*\*  $p < 0.01$ .
