# Supplementary material for: Three-Dimensional Culture Modelling Reveals Divergent Mycobacterium tuberculosis Virulence and Antimicrobial Treatment Response
Source: Hindawi journal article supplement (doi:10.1155/2024/6458900), 2024-05-03
Supplement: f2 [file 6458900.f2.pdf]

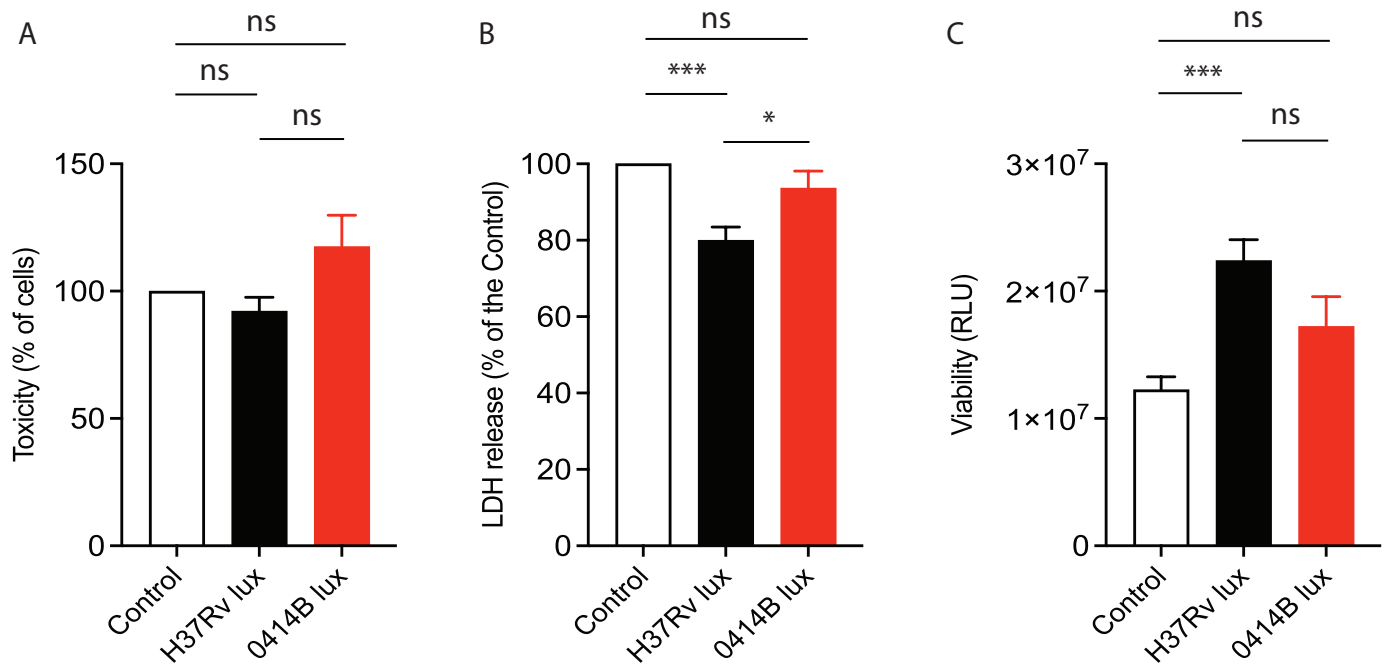

**Fig. S2: Survival of host cells at day 7.** Upon infection with either H37Rv lux (black), reduced cytotoxicity compared to uninfected cells was noted by LDH release and Cell Titer-Glo 3-D cell viability assay. When compared to 0414B lux (red), no difference was observed in host cell toxicity measured by CytoTox-Glo cytotoxicity assay (A) or Cell Titer-Glo 3-D cell viability assay (C) between strains. Toxicity of host cells infected with H37Rv lux was significantly lower than cells infected with clinical isolate 0414B lux at day 7 when analysed by the LDH cytotoxicity assay (B). Data are mean  $\pm$  SEM of 3 separate experiments. Statistics: Ordinary one-way ANOVA with Tukey's multiple comparisons test (A,B,C); \*\*\*  $p < 0.001$ , \*  $p < 0.1$ , ns  $p > 0.05$ .
