# Supplementary material for: Three-Dimensional Culture Modelling Reveals Divergent Mycobacterium tuberculosis Virulence and Antimicrobial Treatment Response
Source: Hindawi journal article supplement (doi:10.1155/2024/6458900), 2024-05-03
Supplement: f3 [file 6458900.f3.pdf]

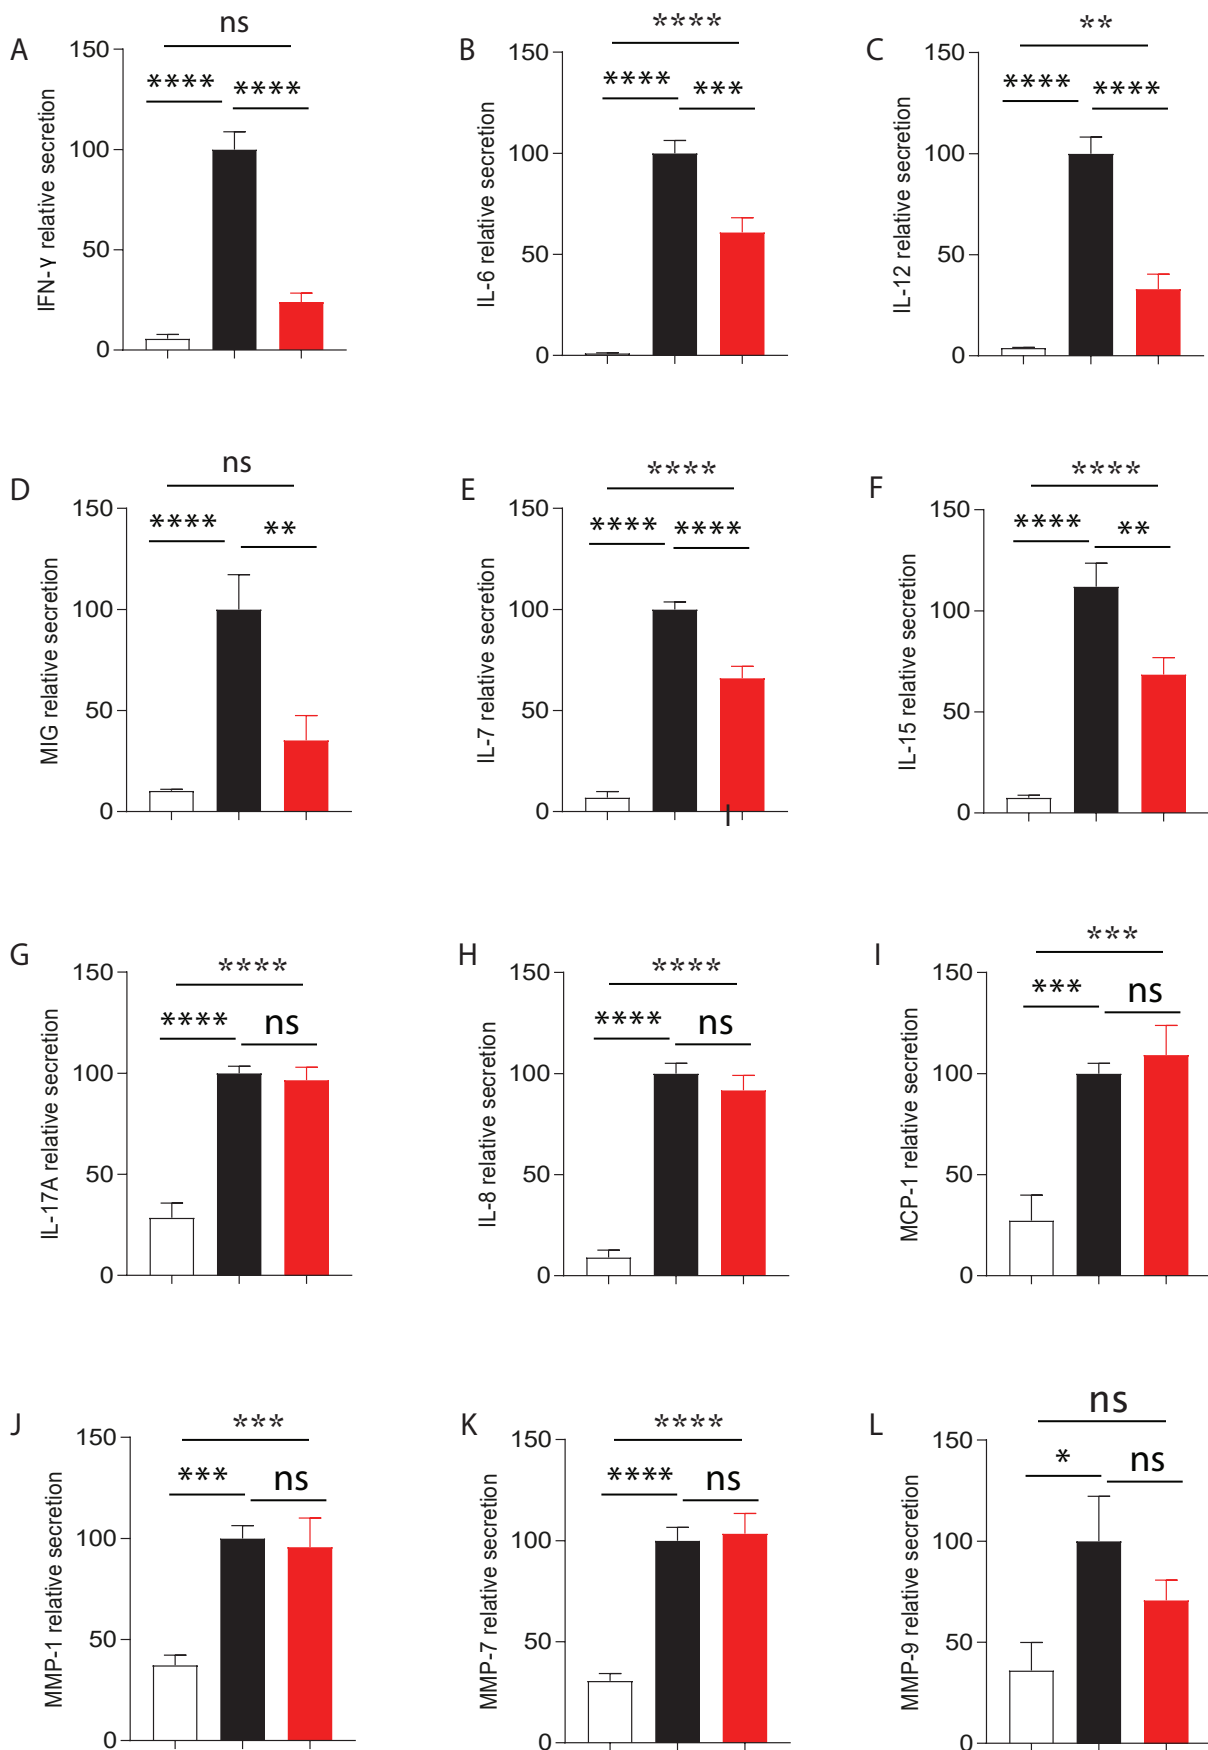

**Fig. S3: Secretion of multiple cytokines by 0414B-infected cells is reduced relative to H37Rv infected cells.** The clinical isolate 0414B lux was significantly less pro-inflammatory than the laboratory strain H37Rv lux. Panels A, B, C, D, E and F show six significantly different cytokines in response to the two strains. Panels G, H, I, J, K and L illustrate cytokines and MMPs that were secretion was similarly upregulated in response to the two strains, analysed in the same samples by Luminex multiplex array. Uninfected PBMCs are control. Normalised data from two donors analysed in triplicate are presented (data are presented as a percentage vs H37Rv lux strain). Statistical analyses were performed using Ordinary one-way ANOVA with Tukey's multiple comparisons test; \*\*\*\*  $p < 0.0001$ , \*\*\*  $p < 0.001$ , \*\*  $p < 0.01$ , \*  $p < 0.1$ , ns  $p > 0.05$ .
