# Supplementary material for: Three-Dimensional Culture Modelling Reveals Divergent Mycobacterium tuberculosis Virulence and Antimicrobial Treatment Response
Source: Hindawi journal article supplement (doi:10.1155/2024/6458900), 2024-05-03
Supplement: f5 [file 6458900.f5.pdf]

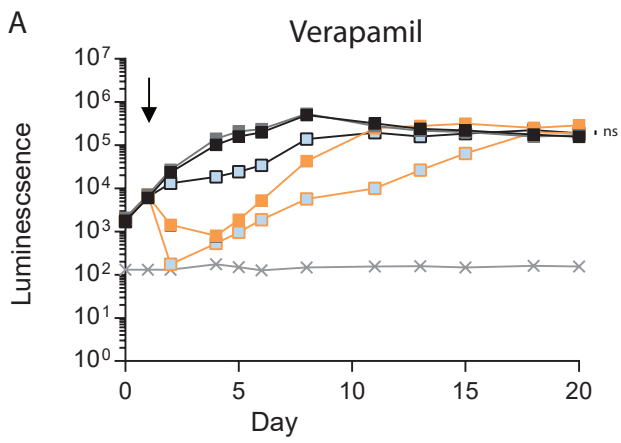

■ Mtb      ■ + DMSO  
 ■ + DLM 0.5    ■ + DLM 0.5 + VPL 50  
 ■ + VPL 50    × Uninfected

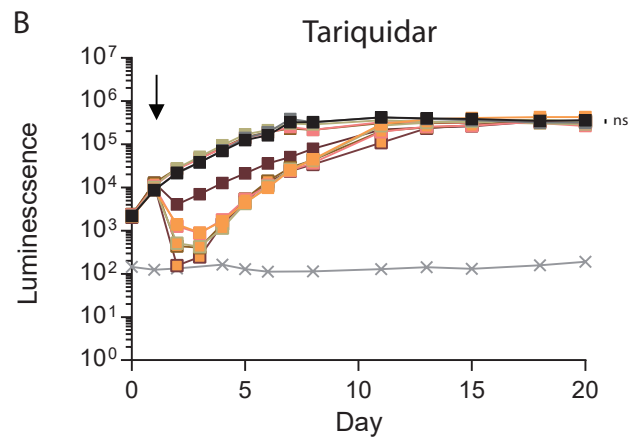

■ Mtb      ■ + DMSO      ■ + DLM 0.5  
 ■ + DLM 0.5 + TQD 0.5    ■ + DLM 0.5 + TQD 5  
 ■ + DLM 0.5 + TQD 10    ■ + DLM 0.5 + TQD 50  
 ■ + TQD 0.5    ■ + TQD 5    ■ + TQD 10  
 ■ + TQD 50    × Uninfected

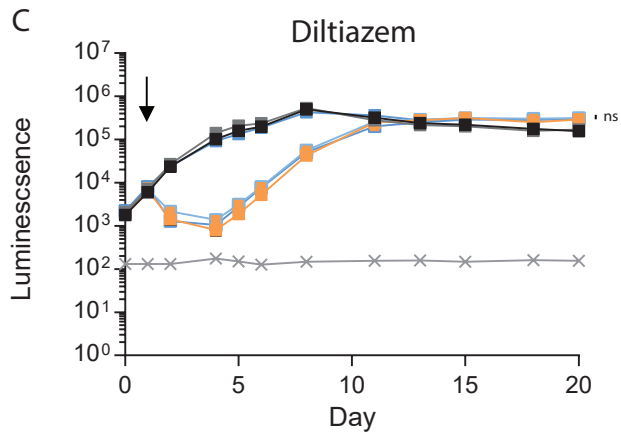

■ Mtb      ■ + DMSO  
 ■ + DLM 0.5    ■ + DLM 0.5 + DLZ 5  
 ■ + DLM 0.5 + DLZ 50    ■ + DLZ 50  
 × Uninfected

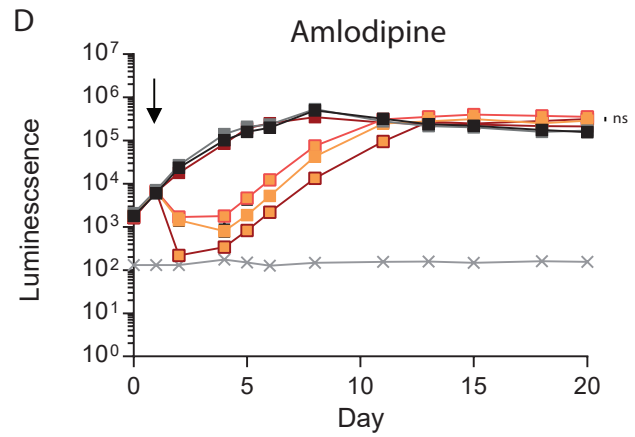

■ Mtb      ■ + DMSO      ■ + DLM 0.5  
 ■ + DLM 0.5 + AML 3    ■ + DLM 0.5 + AML 30  
 ■ + AML 30    × Uninfected

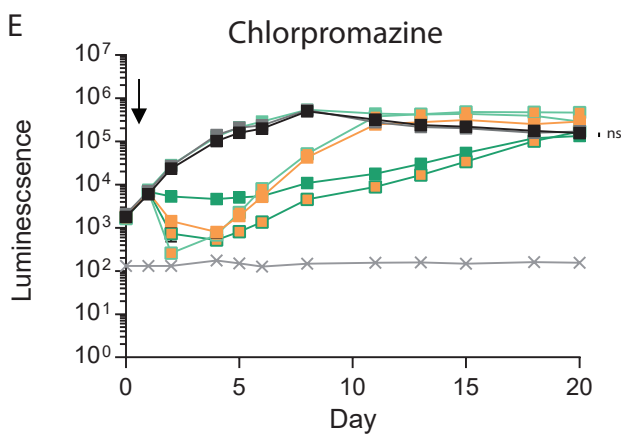

■ Mtb      ■ + DMSO  
 ■ + DLM 0.5    ■ + DLM 0.5 + CPZ 2  
 ■ + CPZ 2      ■ + DLM 0.5 + CPZ 20  
 ■ + CPZ 20    × Uninfected

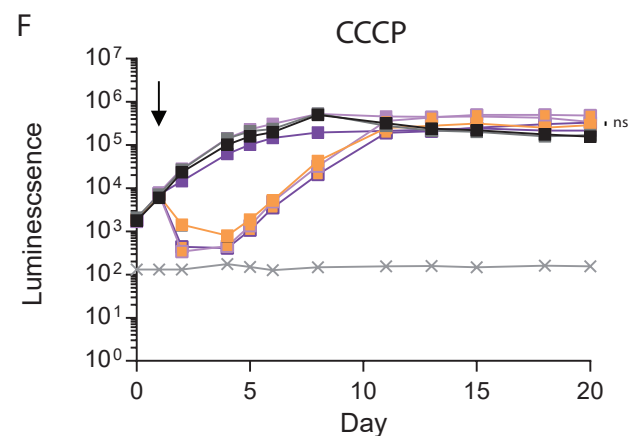

■ Mtb      ■ + DMSO      ■ + DLM 0.5  
 ■ + DLM 0.5 + CCCP 2    ■ + CCCP 2  
 ■ + DLM 0.5 + CCCP 20    ■ + CCCP 20  
 × Uninfected

Figure S5
